# Supplementary material for: Evaluation of Factors Affecting the Expression of Anti-HBs in Children in Hunan Province
Source: Research Square preprint supplement (doi:10.21203/rs.3.rs-962347/v1), 2021-10-26
Supplement: Supplementary file 1 [file 5525812ad0774b028b4d669b.xlsx]

## Sheet: Sheet1
Table 5. Univariable logistic regression analyze results of four age subgroups.
Variable	0.5~2.99 years(n=1166)		3~5.99 years(n=1680)		6~11.99 years(n=2265)		12~18 years(n=727)
	OR(95%CI)	P value	OR(95%CI)	P value	OR(95%CI)	P value	OR(95%CI)	P value
Whether the children had a history of second-hand cigarette exposure
No	0.891(0.650-1.221)	0.474	1.106(0.891-1.347)	0.361	0.844(0.699-1.019)	0.078*	0.971(0.693-1.361)	0.864
Yes#
Anemia
No	0.275(0.132-0.573)	<0.001***	0.758(0.516-1.112)	0.156	0.838(0.603-1.166)	0.293	0.964(0.444-2.092)	0.927
Yes#
Lead intoxication
No	-	-	1.567(0.22-11.111)	0.645	0.204(0.025-1.634)	0.134	0.965(0.176-5.319)	0.968
Yes#	-	-
Cadmium intoxication
No	1.786(0.929-3.436)	0.082*	1.106(0.525-2.331)	0.79	1.225(0.732-2.409)	0.44	1.236(0.473-3.226)	0.666
Yes#
Zinc deficiency
No	0.786(0.580-1.065)	0.119	0.741(0.574-0.958)	0.022**	1.186(0.980-1.435)	0.079*	1.309(0.96-1.786)	0.089*
Yes#
Copper deficiency
No	0.873.(0.566-1.344)	0.536	1.235(0.978-1.56)	0.076*	1.073(0.892-1.292)	0.453	1.153(0.842-1.580)	0.375
Yes#
Calcium deficiency
No	1.812(0.330-9.901)	0.494	1.217(0.729-2.028)	0.454	0.958(0.796-1.152)	0.646	0.756(0.549-1.041)	0.087*
Yes#
Iron deficiency
No	0.789(0.596-1.043)	0.095*	0.925(0.755-1.134)	0.451	1.011(0.82-1.248)	0.915	1.111(0.589-2.096)	0.745
Yes#
Age	2.476(1.932-3.172)	<0.001***	1.151(1.028-1.288)	0.014**	0.971(0.923-1.021)	0.247	0.968(0.853-1.098)	0.609
WBC(10^9/L)	0.93(0.872-0.992)	0.028**	0.98(0.935-1.028)	0.405	0.993(0.949-1.038)	0.746	1.008(0.913-1.112)	0.882
VitD(ng/ml)	0.978(0.971-0.986)	<0.001***	0.995(0.988-1.001)	0.112	0.997(0.99-1.003)	0.286	0.984(0.972-0.996)	0.010**
#Reference group; *P<0.10; **P<0.05; ***P<0.01
